# Supplementary material
Source: MDPI journal article supplement (https://www.mdpi.com/1999-4907/11/12/1267)
Supplement: s1 [file s1]

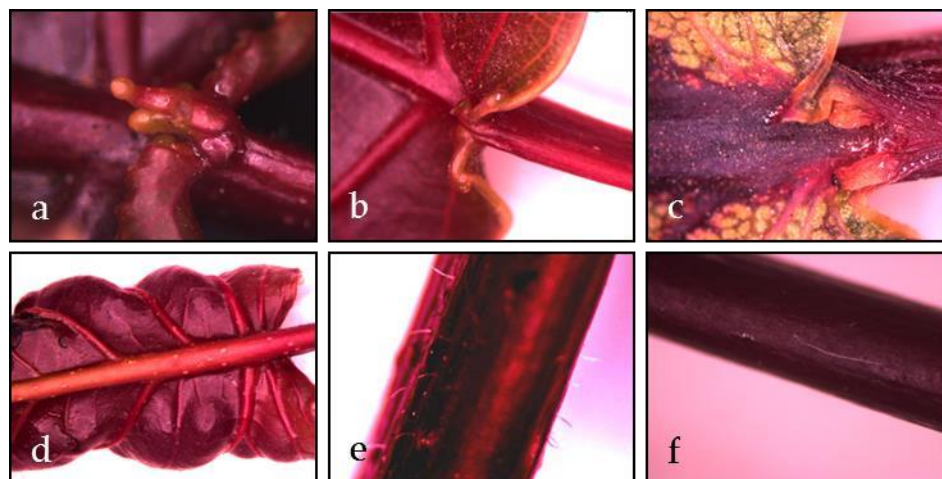

**Figure S7.** Basilar glands (a-c), abaxial surface (d) and petiole (e,f) of *P. deltooides* ssp. *deltooides* leaves.
