# Supplementary material
Source: MDPI journal article supplement (https://www.mdpi.com/1999-4907/11/12/1267)
Supplement: s1 [file s1]

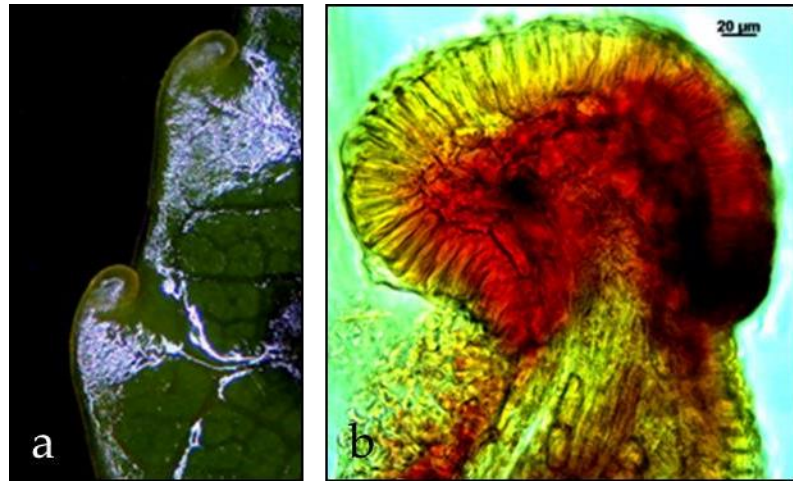

**Figure S1.** Marginal glands of *P. nigra*: general view of the location of salicoid teeth (**a**) and the enlarged image of the glandular part (**b**).
