# Supplementary material
Source: MDPI journal article supplement (https://www.mdpi.com/1999-4907/11/12/1267)
Supplement: s1 [file s1]

**Table S1.** Poplar trees samples, origin, collectors and Herbarium voucher location and number.

| No | Species                                                                                                                      | Origin of voucher, collectors                                                                                                                                                                                      | Herbarium voucher location and number |
|----|------------------------------------------------------------------------------------------------------------------------------|--------------------------------------------------------------------------------------------------------------------------------------------------------------------------------------------------------------------|---------------------------------------|
| 1. | <i>P. deltoides</i> W.<br>Bartram ex Marshall.<br><i>ssp. monilifera</i> (Ait.)<br>Eckenw.                                   | USA, Colorado, 77.<br><b>Collector:</b> V.I. Nekrasov, L.S.<br>Plotnikova, I.V. Belolipov.                                                                                                                         | MHA № 675.                            |
| 2. | <i>P. deltoides</i> W.<br>Bartram ex Marshall.<br><i>ssp. monilifera</i> (Ait.)<br>Eckenw.                                   | USA, Texas.<br>30.04.1986.<br><b>Collector:</b> Barbara C. Reuter.                                                                                                                                                 | MHA № 495.                            |
| 3. | <i>P. deltoides</i> W.<br>Bartram ex Marshall.<br><i>ssp. monilifera</i> (Ait.)<br>Eckenw. var.<br><i>occidentalis</i> Rydh. | Canada, Saskatchewan<br>Landing.<br>4.06.1970.<br><b>Collector:</b> J. Locman.                                                                                                                                     | MHA № 14022.                          |
| 4. | <i>P. deltoides</i> W.<br>Bartram ex Marshall.<br><i>ssp. monilifera</i> (Ait.)<br>Eckenw                                    | USA, Missouri Monroe County.<br>12.06.1974.<br><b>Collector:</b> Jarvis Hudson.                                                                                                                                    | MHA № 363.                            |
| 5. | <i>P. deltoides</i> W.<br>Bartram ex Marshall.<br><i>ssp. deltoides</i>                                                      | USA, Wyoming.<br>12.07.1982.<br><b>Collector:</b> B.E. Nelson.                                                                                                                                                     | MHA № 9016.                           |
| 6. | <i>P. deltoides</i> W.<br>Bartram ex Marshall.<br>“Purple Tower”. <i>ssp. deltoides</i>                                      | Russia, Moscow, Mytyschy<br>nursery. Tymiriazevskaya<br>street, VNIISB.<br>07.10.2020.<br><b>Collector:</b> O.S. Alexandrov.                                                                                       |                                       |
| 7. | <i>P. nigra</i> L.                                                                                                           | Russia, Moscow, Mylashenkova<br>street, garage opposite<br>Yablochkova street, b. 49.<br><b>Coordinates:</b><br>55°83'05.48", 37°57'46.29"<br>18.06.2020.<br><b>Collector:</b> O.S. Alexandrov,<br>T.A. Feodorova. | MW1063503,<br>MW1063505               |
| 8. | <i>P. nigra</i> L.                                                                                                           | Russia, Volgograd region,<br>Sredniaya Akhtuba area, Volgo-                                                                                                                                                        | MW1063524                             |

---

|     |                                                                                                           |                                                                                                                                                                                                                                                                                                                                                                                                                            |           |
|-----|-----------------------------------------------------------------------------------------------------------|----------------------------------------------------------------------------------------------------------------------------------------------------------------------------------------------------------------------------------------------------------------------------------------------------------------------------------------------------------------------------------------------------------------------------|-----------|
|     |                                                                                                           | Akhtubinskaya floodplain,<br>camp Orlenok, sand river bank.<br>Left tree № 1.<br>20.08.2018.                                                                                                                                                                                                                                                                                                                               |           |
| 9.  | <i>P.nigra</i> L.                                                                                         | <b>Collector:</b> T.A. Feodorova.<br>Russia, Volgograd region,<br>Sredniaya Akhtuba area, Volgo-<br>Akhtubinskaya floodplain,<br>camp Orlenok, sand river bank.<br>Right tree № 2.<br>20.08.2018.                                                                                                                                                                                                                          | MW1063525 |
| 10. | <i>P.nigra</i> L.                                                                                         | <b>Collector:</b> T.A. Feodorova.<br>Russia, Volgograd region,<br>Sredniaya Akhtuba area, Volgo-<br>Akhtubinskaya floodplain,<br>camp Orlenok, sand river bank.<br>Right tree № 3.<br>20.08.2018.                                                                                                                                                                                                                          | MW1063526 |
| 11. | <i>P nigra</i> L.                                                                                         | <b>Collector:</b> T.A. Feodorova.<br>Russia, Volgograd region,<br>Sredniaya Akhtuba area, Volgo-<br>Akhtubinskaya floodplain,<br>camp Orlenok, sand river bank.<br>Right tree № 4.<br>20.08.2018.                                                                                                                                                                                                                          | MW1063527 |
| 12  | <i>P.nigra</i> var. <i>italica</i><br>Münchh. (= <i>P. nigra</i> L.<br>ssp. <i>pyramidalis</i><br>Čelak.) | <b>Collector:</b> T.A. Feodorova.<br>Russia, Moscow,<br>Listvennichnaya avenue,<br>(Russian State Agrarian<br>University), bild. 5A, Molecular<br>biotechnology center, tree from<br>branch of tree from Tikhoretsk,<br>Krasnodar region, <b>coordinates</b><br>of donor tree:<br>45°85'29.50'', 40°12'19.06''<br><b>Coordinates:</b><br>55°83'51.90'', 37°55'46.03''<br>20.06.2019.<br><b>Collector:</b> O.S. Alexandrov, | MW1063523 |

---

---

|     |                                                                                                            |                                                                                                                                                                                                                                                                                                                                                        |                                       |
|-----|------------------------------------------------------------------------------------------------------------|--------------------------------------------------------------------------------------------------------------------------------------------------------------------------------------------------------------------------------------------------------------------------------------------------------------------------------------------------------|---------------------------------------|
|     |                                                                                                            | T.A. Feodorova.                                                                                                                                                                                                                                                                                                                                        |                                       |
| 13. | <i>P. × canadensis</i><br>Moench. ( <i>P. nigra</i> L. ×<br><i>P. deltoides</i> W.<br>Bartram ex Marshall) | Russia, Moscow, Ivanovskaia<br>street, b. 3, between parking<br>and sports ground of Dubky,<br>near St. Nicolas church.<br><b>Coordinates:</b><br>55°81'89.16'', 37°56'84.11''<br>18.06.2020.<br><b>Collector:</b> O.S. Alexandrov,<br>T.A. Feodorova.                                                                                                 | MW1063509,<br>MW1063512,<br>MW1063516 |
| 14  | <i>P. × canadensis</i><br>Moench.                                                                          | Russia, Moscow,<br>Listvennichnaya avenue,<br>(Russian State Agrarian<br>University), bild. 5A, Molecular<br>biotechnology center, tree from<br>branch of tree from Main<br>Botanical Garden RAN<br>collection cutting.<br><b>Coordinates:</b><br>55°83'51.72'', 37°55'55.98''<br>12.06.2018.<br><b>Collector:</b> O.S. Alexandrov,<br>T.A. Feodorova. | MW1063502                             |
| 15  | <i>P. × canadensis</i><br>Moench.                                                                          | Russia, Krasnodar region,<br>Ukrainsky village.<br><b>Coordinates:</b><br>45°94'86.16'', 39°81'16.56''<br>05.07.2017.<br><b>Collector:</b> I.N. Alexandrova.                                                                                                                                                                                           |                                       |
| 16. | <i>P. × canadensis</i><br>Moench.                                                                          | Russia, Krasnodar region,<br>Tikhoretsk, near old hospital.<br>05.07.2017.<br><b>Collector:</b> O.S. Alexandrov.                                                                                                                                                                                                                                       | MW1005673                             |
| 17  | <i>P. × canadensis</i><br>Moench.                                                                          | Russia, Moscow, Mylashenkova<br>street, lawn opposite<br>Yablochkova street, b. 49.<br><b>Coordinates:</b><br>55°83'02.64'', 37°57'51.60''<br>18.06.2020.                                                                                                                                                                                              | MW1063508,<br>MW1063520               |

---

---

|     |                                   |                                                                                                                                                                                                                    |                         |
|-----|-----------------------------------|--------------------------------------------------------------------------------------------------------------------------------------------------------------------------------------------------------------------|-------------------------|
|     |                                   | <b>Collector:</b> O.S. Alexandrov,<br>T.A. Feodorova.                                                                                                                                                              |                         |
| 18. | <i>P. × canadensis</i><br>Moench. | Russia, Moscow, Large Garden<br>Pond (Russian State Agrarian<br>University), Entrance of the<br>Garden.<br>25.06.2020.                                                                                             | MW1063511,<br>MW1063517 |
|     |                                   | <b>Collector:</b> T.A. Feodorova.                                                                                                                                                                                  |                         |
| 19. | <i>P. × canadensis</i><br>Moench. | Russia, Moscow, Large Garden<br>Pond (Russian State Agrarian<br>University), sandy beach, big<br>tree.<br>25.06.2020.                                                                                              | MW1063507,<br>MW1063518 |
|     |                                   | <b>Collector:</b> T.A. Feodorova.                                                                                                                                                                                  |                         |
| 20. | <i>P. × canadensis</i><br>Moench. | Russia, Moscow, Large Garden<br>Pond (Russian State Agrarian<br>University), sandy beach, small<br>tree.<br>25.06.2020.                                                                                            | MW1063510,<br>MW1063519 |
|     |                                   | <b>Collector:</b> T.A. Feodorova.                                                                                                                                                                                  |                         |
| 21. | <i>P. × canadensis</i><br>Moench. | Russia, Moscow, at intersection<br>of Kostyakova and akad.<br>Lysitsina streets.<br>Coordinates:<br>55°81'63.65'', 37°56'93.60''<br>18.06.2020.                                                                    | MW1063521,<br>MW1063513 |
|     |                                   | <b>Collector:</b> O.S. Alexandrov,<br>T.A. Feodorova.                                                                                                                                                              |                         |
| 22. | <i>P. × canadensis</i><br>Moench. | Russia, Krasnodar region,<br>Tikhoretsk, near bilding of<br>Tikhoretskaya distance of<br>signaling, centralization and<br>blocking (ShCh-4).<br><b>Coordinates:</b><br>45°85'31.07'', 40°12'04.40''<br>05.07.2017. | MW1005672               |
|     |                                   | <b>Collector:</b> O.S. Alexandrov.                                                                                                                                                                                 |                         |
| 23. | <i>P. × canadensis</i><br>Moench. | Russia, Moscow region,<br>Odintsovskiy area, Lutsino                                                                                                                                                               | MW1053522               |

---

---

|    |                        |                                    |
|----|------------------------|------------------------------------|
|    |                        | village, food shop.<br>23.06.2019. |
|    |                        | <b>Collector:</b> T.A. Feodorova.  |
| 24 | <i>P. × canadensis</i> | Russia, Moscow, Mytyschy           |
|    | Moench. "Serotina      | nursery. Tymiriazevskaya           |
|    | Aurea"                 | street, VNIISB.                    |
|    |                        | 07.10.2020.                        |
|    |                        | <b>Collector:</b> O.S. Alexandrov. |

---
