# Supplementary material
Source: MDPI journal article supplement (https://www.mdpi.com/1999-4907/11/12/1267)
Supplement: s1 [file s1]

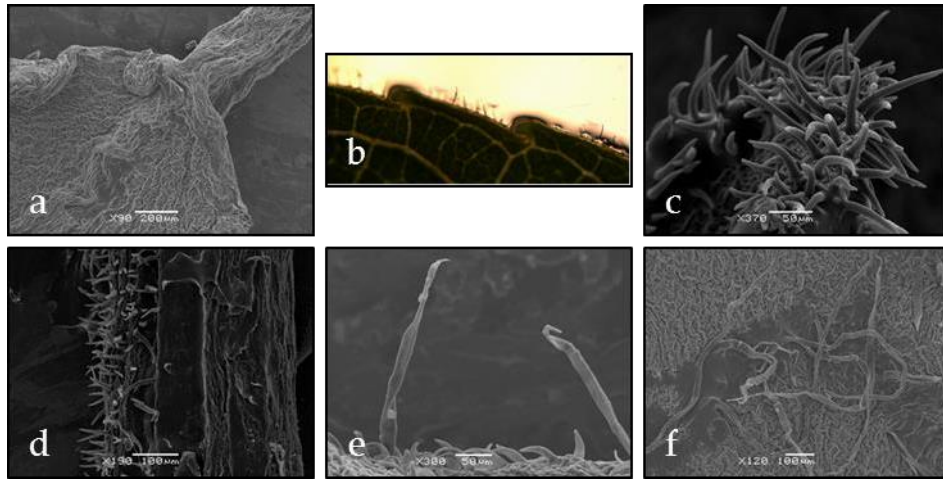

**Figure S11.** Glands and trichomes of *P. × canadensis* leaves: two basilar nectaries-glands (a); marginal glands and short acicular trichomes (b,c); channeled petiole with short and medium acicular trichomes (d); the marginal surfaces of leaf with sparse smooth short of 300-350  $\mu\text{m}$  long (e); long ribbon trichomes of abaxial surface (f).
