# Supplementary material
Source: MDPI journal article supplement (https://www.mdpi.com/1999-4907/11/12/1267)
Supplement: s1 [file s1]

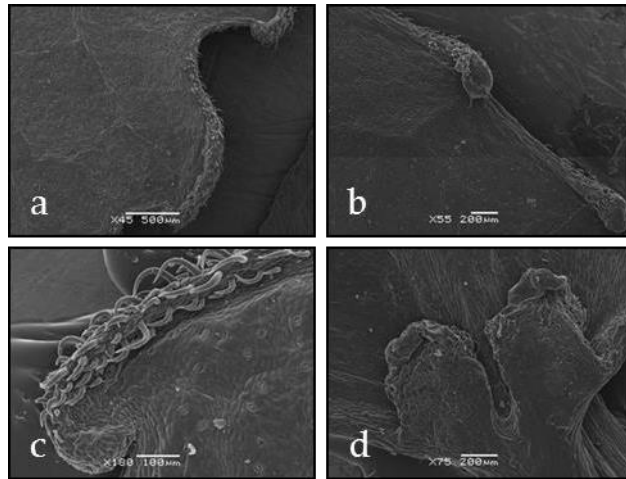

**Figure S8.** The micromorphological features of *P. deltoides* ssp. *moniliferae* leaves: marginal glands (salicoid teeth) and margins of leaf with short acicular trichomes (**a-c**); two hairy basilar nectarines-glands (**d**).
