# Supplementary material
Source: MDPI journal article supplement (https://www.mdpi.com/1999-4907/11/12/1267)
Supplement: s1 [file s1]

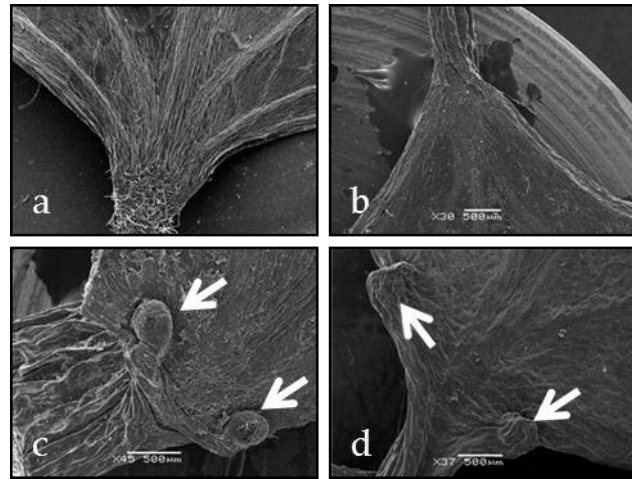

**Figure S4.** Leaves of *P. nigra* without basilar glands (**a-b**) and with basilar glands (**c-d**). Arrows indicate basilar glands.
