# Supplementary material
Source: MDPI journal article supplement (https://www.mdpi.com/1999-4907/11/12/1267)
Supplement: s1 [file s1]

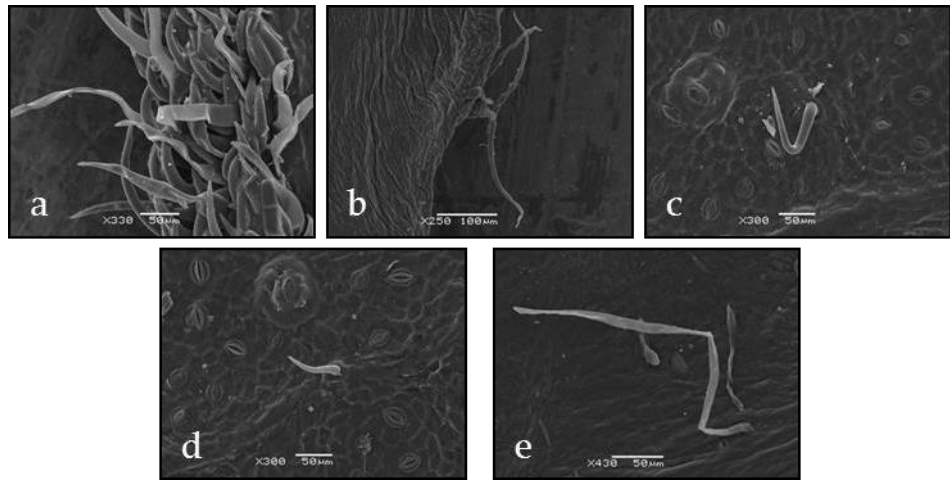

**Figure S9.** Trichomes of *P. deltoides* ssp. *moniliferae* leaves: marginal short and long acicular and ribbon trichomes (a); long acicular trichomes of marginal part of leaf (b); short acicular trichomes on the abaxial leaf surface (c,d); long ribbon trichomes on the abaxial leaf surface (e).
