# Supplementary material
Source: MDPI journal article supplement (https://www.mdpi.com/1999-4907/11/12/1267)
Supplement: s1 [file s1]

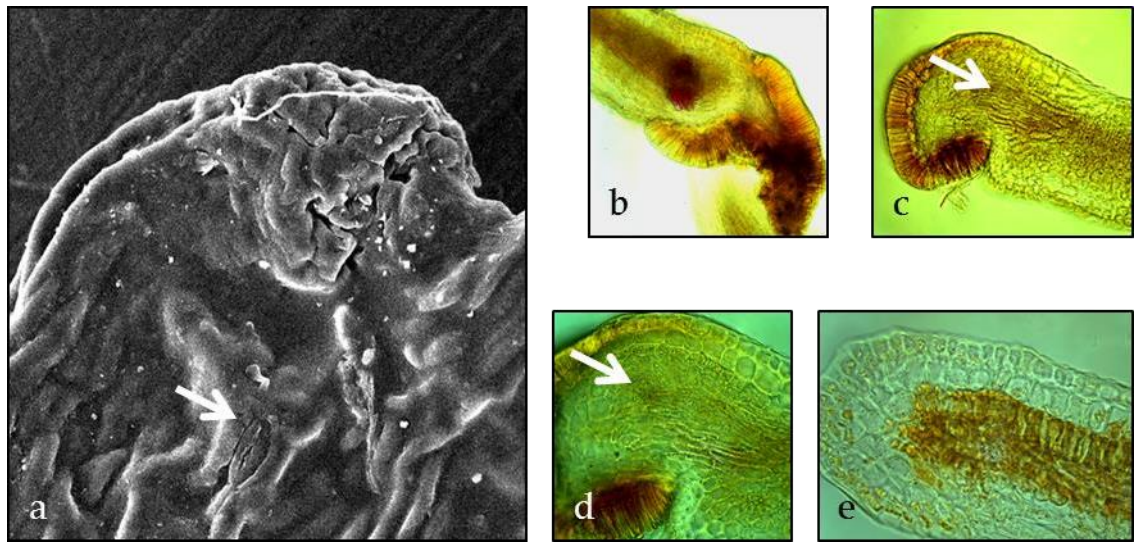

**Figure S3.** The external (a) and internal (b-e) structure of salicoid teeth of *P. nigra*. Arrows indicate stomata (a), vascular bundle (c) and xylem elements (d).
