# Supplementary material
Source: MDPI journal article supplement (https://www.mdpi.com/1999-4907/11/12/1267)
Supplement: s1 [file s1]

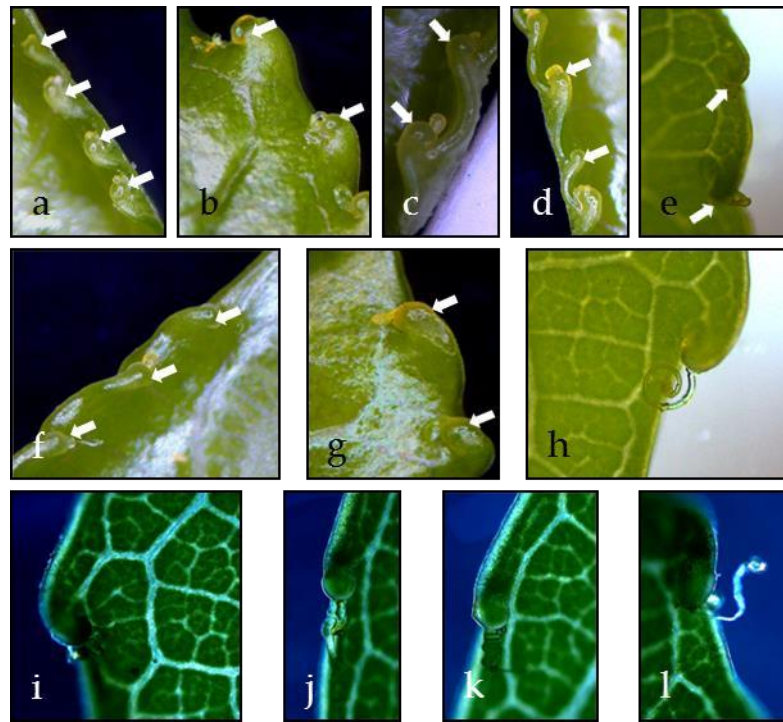

**Figure S2.** Differences in forms and lengths of glandular parts of *P. nigra* marginal glands. Arrows indicate glandular parts of teeth.
