# Supplementary material
Source: MDPI journal article supplement (https://www.mdpi.com/1999-4907/11/12/1267)
Supplement: s1 [file s1]

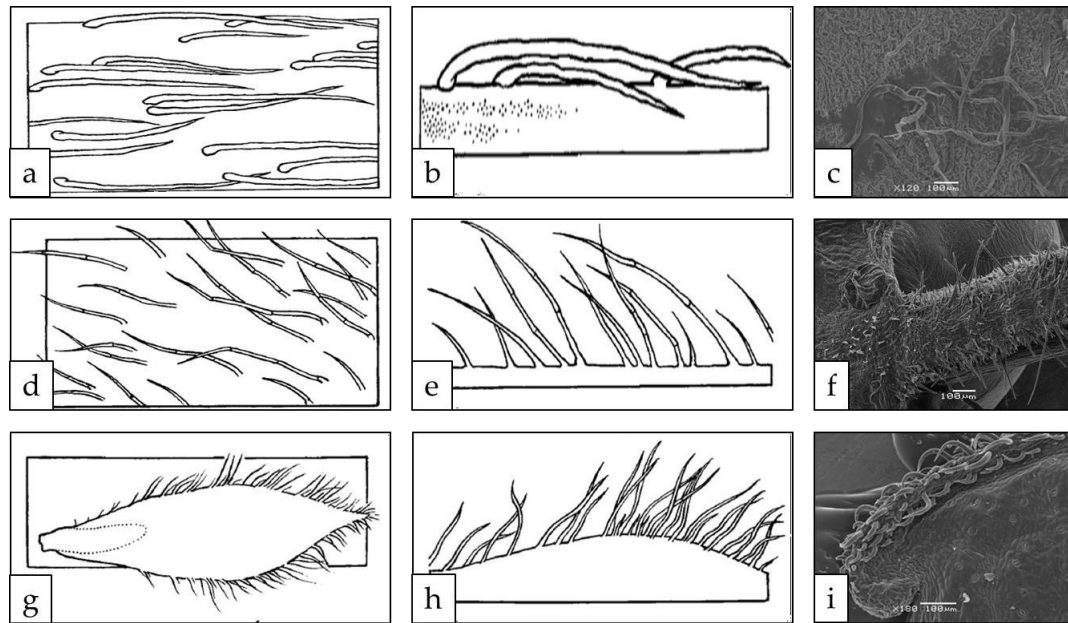

**Figure S12.** Types of leaf indumentum: strigose (**a-c**), pilose (**d-f**); ciliate (**g-i**).  
 Images **a,b,d,e,g,h** are presented from Hewson (2019) [33].
