# Supplementary material
Source: MDPI journal article supplement (https://www.mdpi.com/1999-4907/11/12/1267)
Supplement: s1 [file s1]

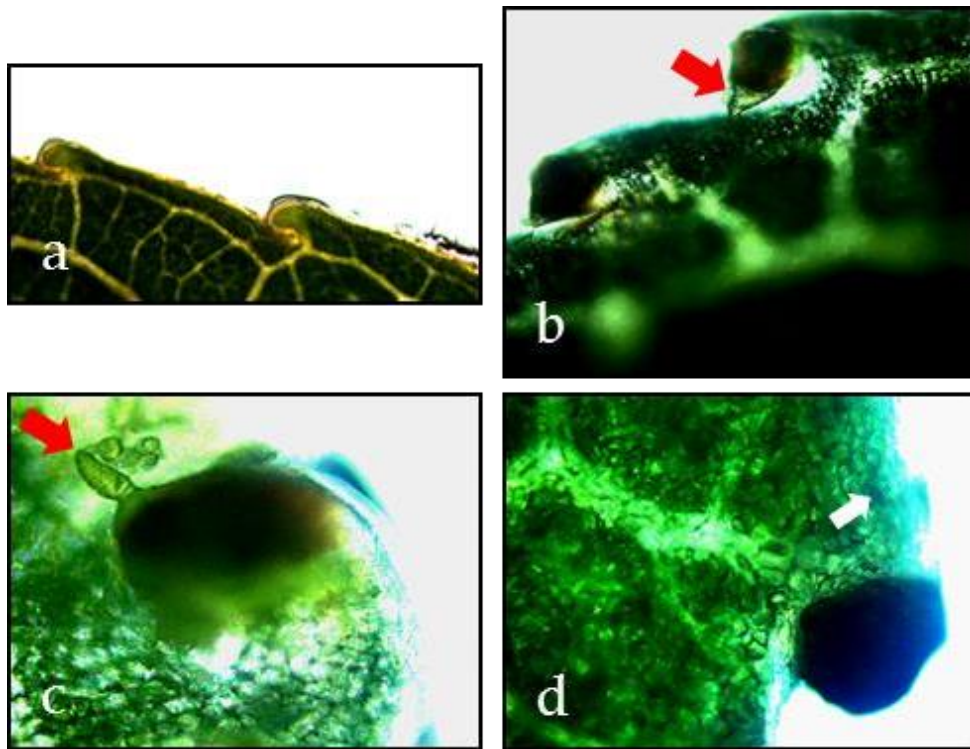

**Figure S10.** The features of edge of *P. x canadensis* leaves: marginal glands (a); glandular part of trichomes with secret (indicated by red arrows) (b,c); the basis of teeth with epidermal cells and one stomata (indicated by white arrow) and the lignified palisade-like cells (d).
