# Supplementary material
Source: MDPI journal article supplement (https://www.mdpi.com/1999-4907/11/12/1267)
Supplement: s1 [file s1]

Archive with 14 entries (14 files):
- Figure S5.pdf
- Figure S6.pdf
- Figure S7.pdf
- Figure S8.pdf
- Figure S9.pdf
- Figure S10.pdf
- Figure S11.pdf
- Figure S12.pdf
- Table S1.pdf
- Table S2.pdf
- Figure S1.pdf
- Figure S2.pdf
- Figure S3.pdf
- Figure S4.pdf
