# Supplementary material
Source: MDPI journal article supplement (https://www.mdpi.com/1999-4907/11/12/1267)
Supplement: s1 [file s1 › Figure S5.pdf]

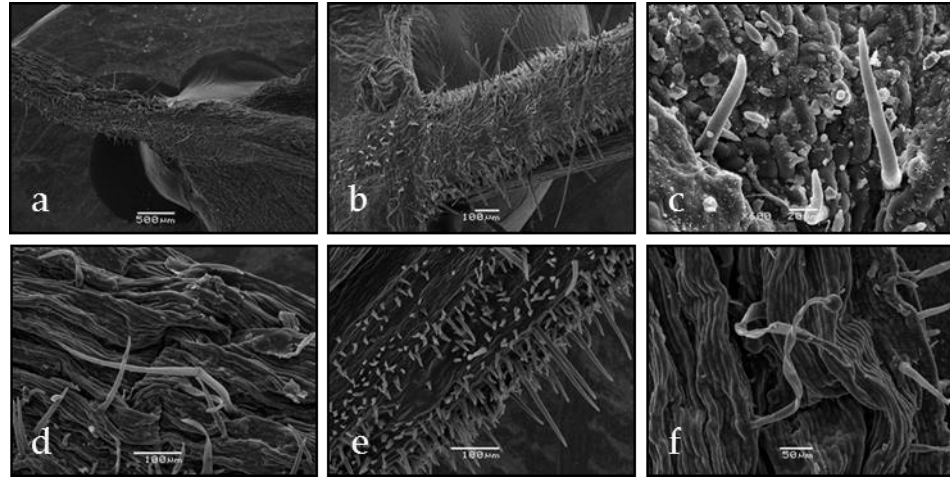

**Figure S5.** Trichomes on *P. nigra* leaves: petiole and basal part of adaxial surface of a young leaf with smooth short, medium simple unicellular acicular trichomes (**a,b**); short acicular trichomes (**c**); medium acicular trichomes (**d**); short and medium acicular trichomes of petiole (**e**); ribbon long trichomes (**f**).
