# Supplementary material
Source: MDPI journal article supplement (https://www.mdpi.com/1999-4907/11/12/1267)
Supplement: s1 [file s1 › Table S2.pdf]

**Table S2.** The used molecular markers and their characteristics.

| Primer name | Sequence                        | Product size, bp       | Enzyme      | Restriction product size, bp | Publication                    |
|-------------|---------------------------------|------------------------|-------------|------------------------------|--------------------------------|
| 5S1         | 5'-GGATGGGTGACCTCCCGGGAAGTCC-3' | different <sup>1</sup> | -           | -                            | Falistooco et al. (2007) [36]  |
| 5S2         | 5'-CGCTTAACTGCGGAGTTCTGATGGG-3' |                        |             |                              | Heinze (1997) [25]             |
| win3-f      | 5'-CCCGAAGTGTCCAGAGC-3'         |                        |             |                              | Holderegger et al. (2005) [26] |
| win3-r      | 5'-CCCACTCAAATAGTCTAC-3'        | 170/200                | -           | -                            | Holderegger et al. (2005) [26] |
| trnLF-f     | 5'-ATTTGAACTGGTGACACGAG-3'      | 1070                   | <i>RsaI</i> | 1070/700/370                 | Holderegger et al. (2005) [26] |
| trnLF-r     | 5'-CGAAATCGGTAGACGCTACG-3'      |                        |             |                              | Taberlet et al. (1991) [37]    |

<sup>1</sup> The product size was different because the non-transcribed spacers of 5S rDNA (NTS) have a different length in different species.
