# Supplementary material
Source: MDPI journal article supplement (https://www.mdpi.com/1999-4907/11/12/1267)

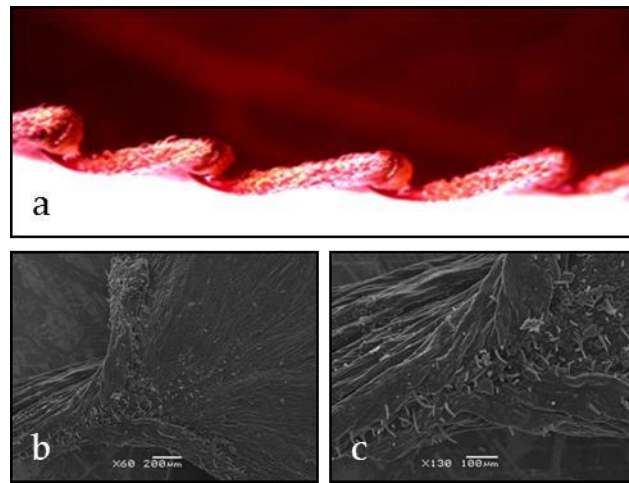

**Figure S6.** Edge (a), basal part and petiole (b,c) of *P. deltoides* ssp. *deltoides* leaves.

Supplement: s1 [file s1]
